# Supplementary material
Source: MDPI journal article supplement (https://www.mdpi.com/2673-4583/14/1/52)

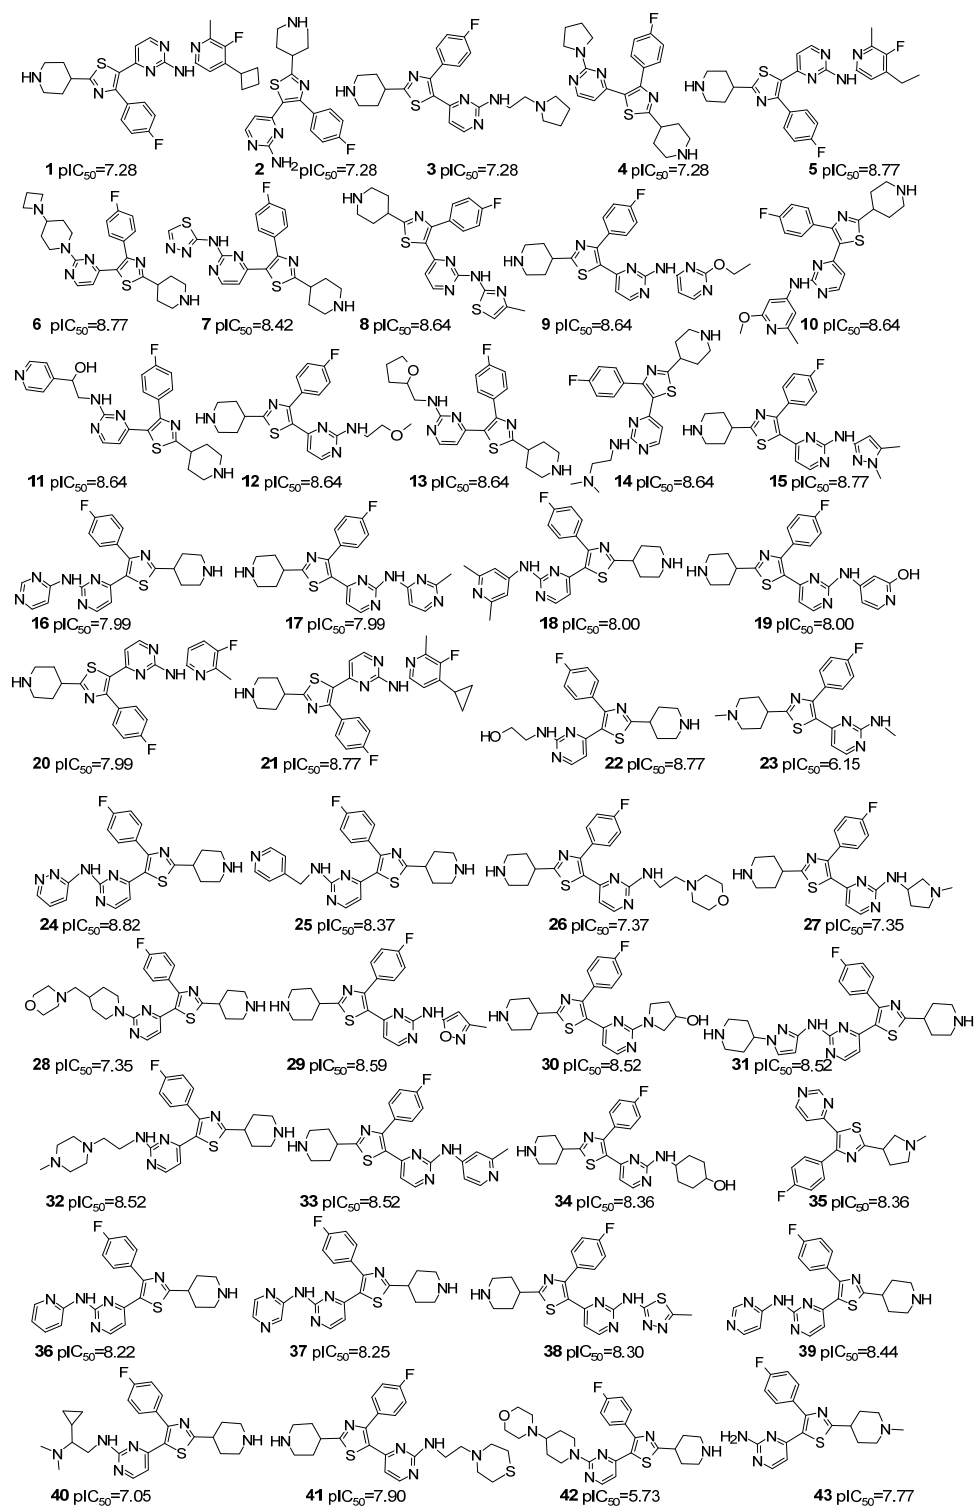

**Figure S1.** Chemical data set (Thiazolyl-pyrimidine hybrid derivatives and their respective  $pIC_{50}$ ).

Supplement: s1 [file s1]
